# Supplementary material
Source: MDPI journal article supplement (https://www.mdpi.com/2410-3888/5/1/6)
Supplement: s1 [file s1]

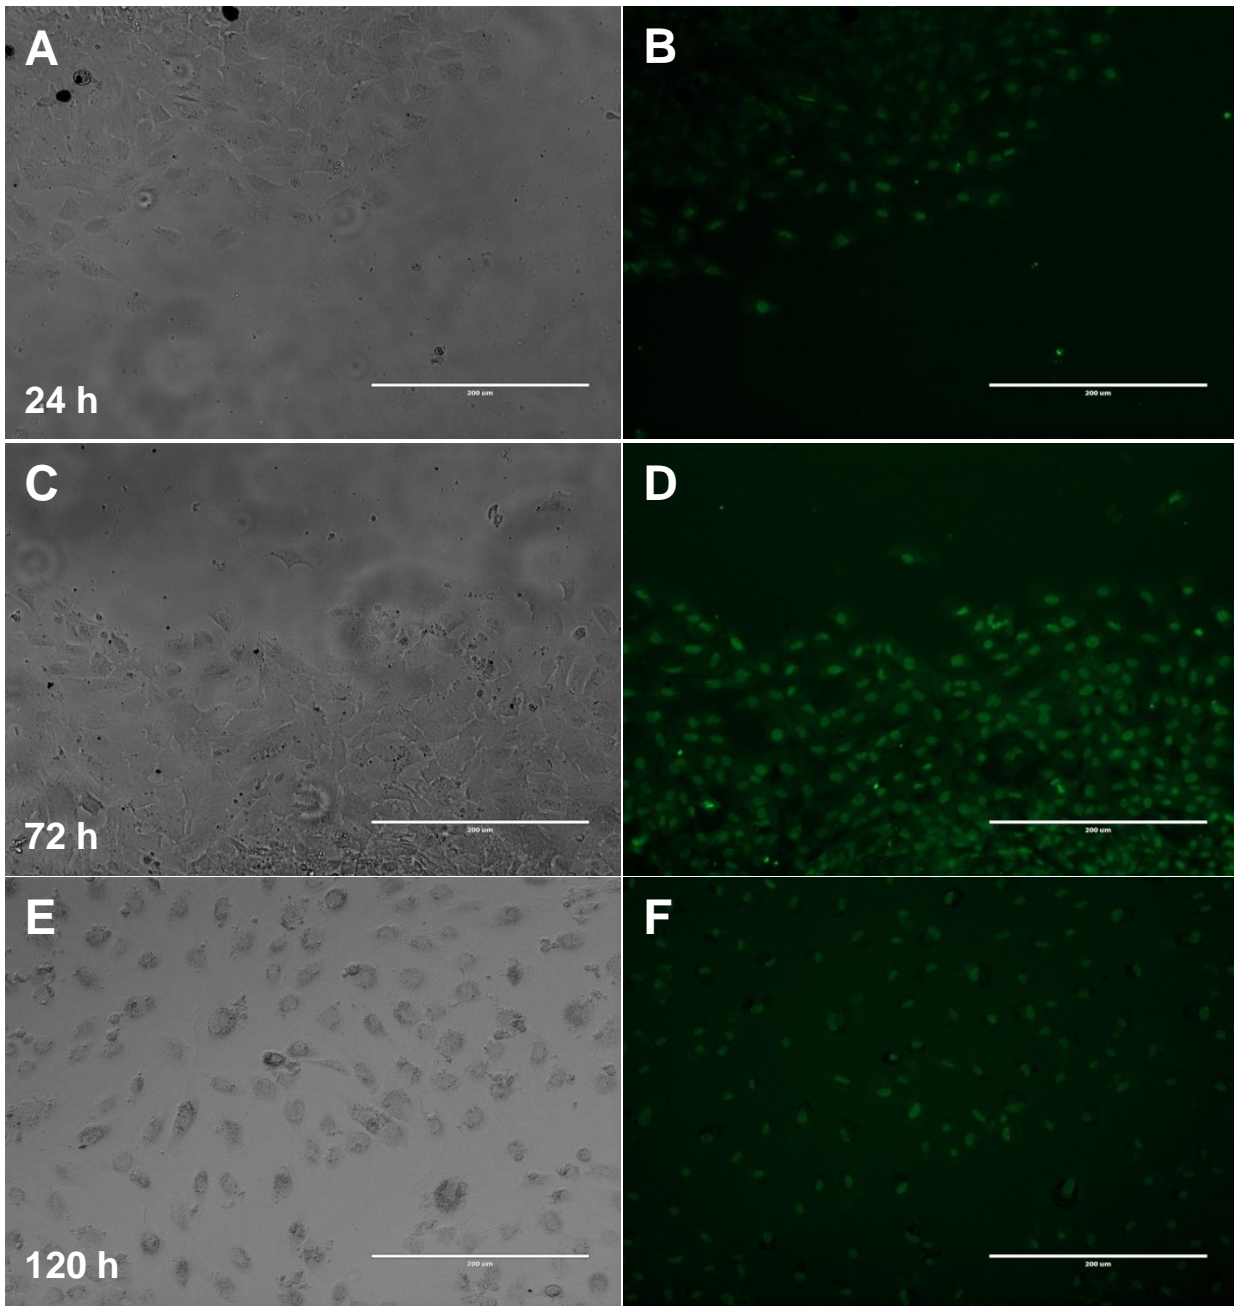

**Supplementary Figure 1.** Phase-contrast (A,C,E) and fluorescence (B,D,F) micrographs of acridine orange stained blastema cells cultured for 24 h (A,B), 72 h (C,D) and 120 h (E,F) in medium supplemented with 5% FBS. Bar is 200  $\mu$ m.
