# Supplementary material
Source: MDPI journal article supplement (https://www.mdpi.com/2410-3888/5/1/6)
Supplement: s1 [file s1]

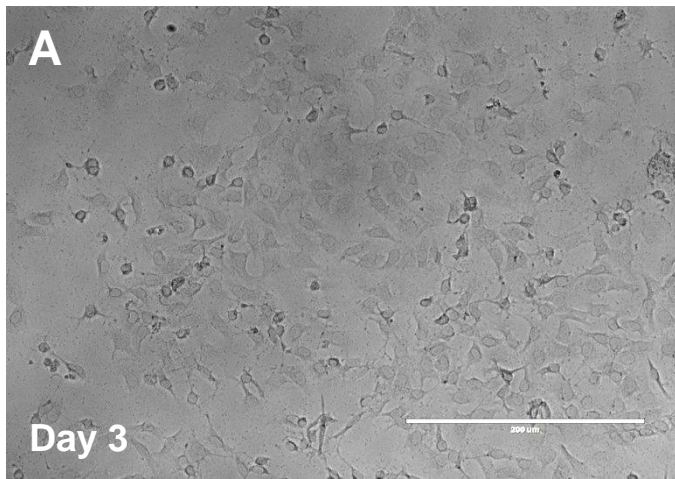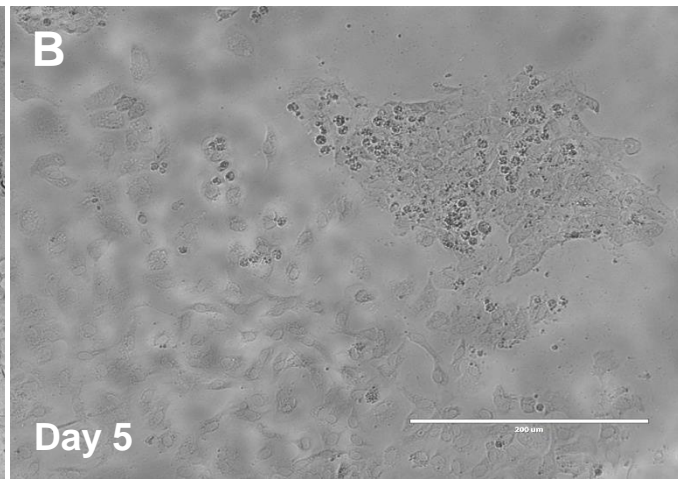

**Supplementary Figure 2.** Phase-contrast micrographs of alizarin red S-stained blastema cells treated for 3 days (**A**) and 5 days (**B**) with the mineralogenic cocktail to induce extracellular matrix mineralization.
