# Supplementary material
Source: MDPI journal article supplement (https://www.mdpi.com/2410-3888/5/1/6)
Supplement: s1 [file s1]

Archive with 2 entries (2 files):
- Supplementary Figure 1.pdf
- Supplementary Figure 2.pdf
